# Supplementary material for: Prioritisation of Compounds for 3CLpro Inhibitor Development on SARS-CoV-2 Variants
Source: MDPI journal article supplement (doi:10.3390/molecules26103003), 2021-05-18
Supplement: s1 [file s1]

## Prioritisation of Compounds for 3CL<sup>pro</sup> Inhibitor Development on SARS-CoV-2 Variants

Marko Jukič <sup>1,2</sup>, Blaž Škrlj <sup>3</sup>, Gašper Tomšič <sup>4</sup>, Sebastian Pleško <sup>5</sup>, Črtomir Podlipnik <sup>6\*</sup> and Urban Bren <sup>1,2\*</sup>

<sup>1</sup> Laboratory of Physical Chemistry and Chemical Thermodynamics, Faculty of Chemistry and Chemical Engineering, University of Maribor, , Smetanova ulica 17, SI-2000 Maribor, Slovenia; marko.jukic@um.si

<sup>2</sup> Faculty of Mathematics, Natural Sciences and Information Technologies, University of Primorska, Glagoljaška 8, SI-6000 Koper, Slovenia

<sup>3</sup> Institute Jožef Stefan, Jamova cesta 39, SI-1000 Ljubljana, Slovenia; blaz.skrj@ijs.si

<sup>4</sup> Independent Researcher, Cesta Cirila Kosmača 66, SI-1000 Ljubljana, Slovenia; gasper.tomsic@icloud.com

<sup>5</sup> Erudio, Litostrojska cesta 40, SI-1000 Ljubljana, Slovenia; sebastian.plesko@erudio.si

<sup>6</sup> Faculty of Chemistry and Chemical Technology, University of Ljubljana, Večna pot 113, SI-1000 Ljubljana, Slovenia

\* Correspondence: crtomir.podlipnik@fkkt.uni-lj.si (Č.P.); urban.bren@um.si (U.B.); Tel: +386-41-440-198 (Č.P.); Tel: +386-2-22-94-421 (U.B.)

Furthermore, we employed the activity data from PostEra Covid Moonshot project ([https://covid.postera.ai/covid/activity\\_data](https://covid.postera.ai/covid/activity_data), accessed on 8.5.2021). We selected compounds with  $\text{pIC}_{50}$  above 7 as true actives and compounds with  $\text{pIC}_{50}$  up to 4.00436 as inactives or experimental decoys (compounds with no data were left out). When using 2% (due to

availability of experimental decoys; 446) and 10% of actives in the test set, we obtained a ROC AUC of 0.605 and 0.6115, respectively, indicating the docking protocol can identify active compounds and produce enriched libraries.

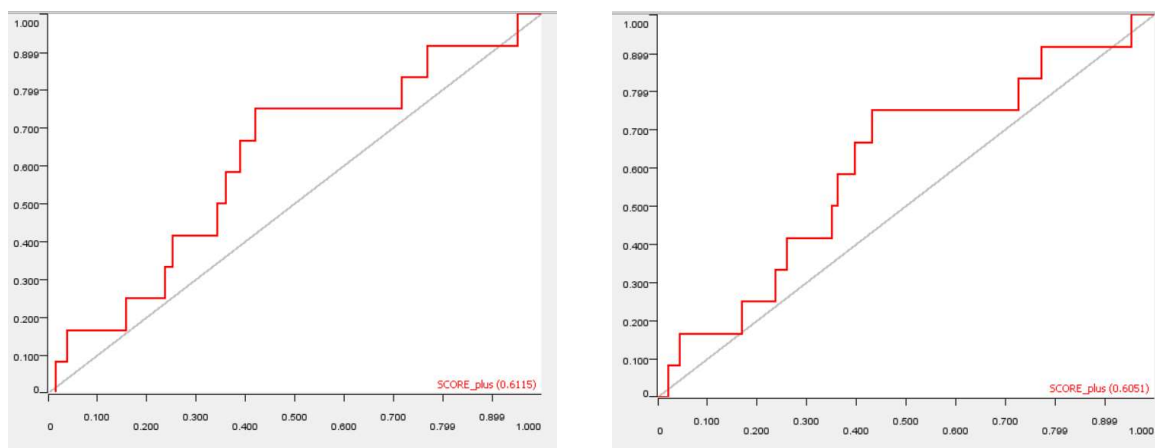

**Figure S2: ROC curves for 2% (left) and 10% (right) actives in the complete test set (PostEra COVID Moonshot project).**

*Postera true actives* ([https://covid.postera.ai/covid/activity\\_data](https://covid.postera.ai/covid/activity_data)):

| STRUCTURE | NAME (PostEra), SMILES                                                                                            |
|-----------|-------------------------------------------------------------------------------------------------------------------|
|           | MSK-46727e7b-1<br><br><chem>CC(C)C[C@H](NC(=O)OCc1ccccc1)C(=O)N[C@@H](C[C@H]1CCNC1=O)[C@H](O)S(=O)(=O)[O-]</chem> |
|           | MAT-POS-e69ad64a-2<br><br><chem>C=CC(=O)N(C(=O)[C@@H]1COc2ccc(Cl)cc21)c1cncc2ccccc12</chem>                       |

|                                                                                     |                                                                                                                    |
|-------------------------------------------------------------------------------------|--------------------------------------------------------------------------------------------------------------------|
| 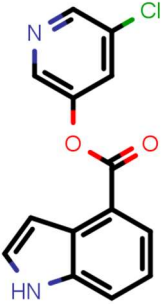   | <p>ALP-POS-c59291d4-5</p> <p><chem>O=C(Oc1cncc(Cl)c1)c1cccc2[nH]ccc12</chem></p>                                   |
|    | <p>MAT-POS-f9802937-8</p> <p><chem>O=C(Nc1cncc2ccccc12)[C@@H]1CCNc2cc(Cl)c(Cl)cc21</chem></p>                      |
|   | <p>MAT-POS-4223bc15-11</p> <p><chem>C[C@H]1CCN(S(=O)(=O)N2Cc3ccc(Cl)cc3[C@H](C(=O)Nc3cncc4ccccc34)C2)C1</chem></p> |
|  | <p>MAT-POS-4223bc15-12</p> <p><chem>N#CC1(CS(=O)(=O)N2Cc3ccc(Cl)cc3[C@H](C(=O)Nc3cncc4ccccc34)C2)CCC1</chem></p>   |

|                                                                                    |                                                                                                     |
|------------------------------------------------------------------------------------|-----------------------------------------------------------------------------------------------------|
| 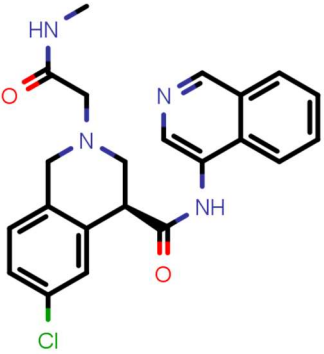  | <p>MAT-POS-4223bc15-23</p> <p><chem>CNC(=O)CN1Cc2ccc(Cl)cc2[C@H](C(=O)Nc2cncc3ccccc23)C1</chem></p> |
|   | <p>MAT-POS-ec6d90b7-6</p> <p><chem>COc1ccc2cncc(NC(=O)[C@H]3CCNc4cc(Cl)c(Cl)cc43)c2c1</chem></p>    |
|  | <p>MAT-POS-a13804f0-3</p> <p><chem>O=C(Nc1cncc2ccccc12)[C@@H]1CCOc2cc(F)c(Cl)cc21</chem></p>        |

### 3. HTVS results

Supplied smiles, all other data is in the supplied xls file.

| no | smiles                                                                                                           | score       |
|----|------------------------------------------------------------------------------------------------------------------|-------------|
| 1  | <chem>O=C(c1ccc2c(c1)C(=O)N(C2=O)c1c(C)n(n(c1=O)c1cccc1)C)c1ccc2c(c1)C(=O)N(C2=O)c1c(C)n(n(c1=O)c1cccc1)C</chem> | 22,8<br>019 |
| 2  | <chem>Clc1ccc(cc1S(=O)(=O)Nc1c(C)n(n(c1=O)c1cccc1)C)C(=O)Nc1ccc(cc1)C(C)(C)C</chem>                              | 21,9<br>941 |
| 3  | <chem>O=C(c1ccc(c(c1)S(=O)(=O)Nc1c(=O)n(n(c1C)C)c1cccc1)Cl)Nc1ccc2c(c1)cccc2</chem>                              | 21,0<br>602 |
| 4  | <chem>COc1ccc(cc1S(=O)(=O)Nc1c(C)n(n(c1=O)c1cccc1)C)c1nnnn1CC</chem>                                             | 20,8<br>952 |
| 5  | <chem>Cn1c(nnc1[C@@H]1C[C@@H](C1)[NH3+])Cn1c(nc2c1cccc2)N1CCCC1</chem>                                           | 20,5<br>798 |

|    |                                                                                     |             |
|----|-------------------------------------------------------------------------------------|-------------|
|    |                                                                                     | -           |
| 6  | <chem>Cc1cn(c(=O)nc1N1CCCCC1)c1nc(oc1c1cccc1)c1cccc1</chem>                         | 21,0<br>488 |
|    |                                                                                     | -           |
| 7  | <chem>Cn1c(=O)n(C)c(=O)c2c1nc(n2CCSc1nc2c(s1)cccc2)N1CCN(CC1)c1cccc1</chem>         | 25,6<br>926 |
|    |                                                                                     | -           |
| 8  | <chem>Cn1c(nnc1[C@@H]1C[C@H](C1)[NH3+])Cn1c(nc2c1cccc2)N1CCCC1</chem>               | 22,5<br>395 |
|    |                                                                                     | -           |
| 9  | <chem>Nc1cccc1c1scc(n1)c1cc(n(c1C)c1ncn[nH]1)C</chem>                               | 22,4<br>204 |
|    |                                                                                     | -           |
| 10 | <chem>[S-]c1nnc(n1c1cnn(c1)Cc1cccc1)C1CCN(CC1)S(=O)(=O)c1cccc1</chem>               | 25,6<br>427 |
|    |                                                                                     | -           |
| 11 | <chem>COc1cc(ccc1O)c1c/c(=N/[C@H](C(=O)[O-])Cc2nc[nH]c2)/c2c(o1)cc(c(c2)Cl)C</chem> | 22,0<br>924 |
|    |                                                                                     | -           |
| 12 | <chem>Clc1cccc(c1)N1CCN(CC1)c1nc2c(n1CCSc1nc3c([nH]1)cccc3)c(=O)[nH]c(=O)n2C</chem> | 21,0<br>076 |
|    |                                                                                     | -           |
| 13 | <chem>Clc1cccc(c1)N1CCN(CC1)c1nc2c(n1CCSc1nc3c(o1)cccc3)c(=O)[nH]c(=O)n2C</chem>    | 23,3<br>288 |
|    |                                                                                     | -           |
| 14 | <chem>CCOC(=O)c1cccc1NC(=O)N[C@H](c1c(sc2c1CCCC2)n1cccc1)C</chem>                   | 24,0<br>728 |
|    |                                                                                     | -           |
| 15 | <chem>Clc1cccc(c1)N1CCN(CC1)c1nc2c(n1CCSc1nnnn1c1cccc1)c(=O)[nH]c(=O)n2C</chem>     | 20,8<br>048 |
|    |                                                                                     | -           |
| 16 | <chem>[S-]c1nnc(n1c1cnn(c1)Cc1cccc1)[C@H]1CCCN(C1)S(=O)(=O)c1cccc1</chem>           | 22,9<br>086 |
|    |                                                                                     | -           |
| 17 | <chem>Clc1ccc(c(c1)Cl)Cn1ncc(c1)n1c([S-])nnc1C1CCN(CC1)S(=O)(=O)C</chem>            | 24,2<br>461 |
|    |                                                                                     | -           |
| 18 | <chem>Cc1nn(c(c1N1CCN(CC1)C(=O)c1[nH]nc(c1)c1cccc1)C)c1cccc1</chem>                 | 22,6<br>734 |
|    |                                                                                     | -           |
| 19 | <chem>CCN(S(=O)(=O)c1ccc(cc1)C(=O)N1CCN(CC1)C1=NS(=O)(=O)c2c1cccc2)CC</chem>        | 23,9<br>761 |
|    |                                                                                     | -           |
| 20 | <chem>[S-]c1nnc(n1c1cnn(c1)Cc1cccc1)[C@H](n1nccc1C)C</chem>                         | 23,2<br>749 |
|    |                                                                                     | -           |
| 21 | <chem>Cc1nn(c(c1N1CCN(CC1)C(=O)c1[nH]nc(c1)c1cccs1)C)[C@H]1CCS(=O)(=O)C1</chem>     | 23,0<br>223 |
|    |                                                                                     | -           |
| 22 | <chem>CC[C@H](c1c(sc2c1CC[N@@H+](C2)CC)n1cccc1)NC(=O)Nc1ccc(c(c1)C)C</chem>         | 21,6<br>719 |
|    |                                                                                     | -           |
| 23 | <chem>Cc1cnn(c1)[C@@H](c1nnc(n1c1cnn(c1)Cc1cccc1)[S-])C</chem>                      | 21,3<br>904 |
|    |                                                                                     | -           |
| 24 | <chem>Clc1cccc1Cn1c(nc2c1c(=O)n(C)c(=O)n2C)N1CC[NH2+][CC1]</chem>                   | 20,5<br>788 |
|    |                                                                                     | -           |
| 25 | <chem>c1ccc(cc1)c1[nH+]c(cn1c1sc(nc1c1cccc1)c1cccc1)c1cccc1</chem>                  | 23,4<br>83  |
|    |                                                                                     | -           |
| 26 | <chem>Clc1ccc(cc1)Cn1ncc(c1)n1c([S-])nnc1[C@@H]1CCCN(C1)S(=O)(=O)C</chem>           | 21,0<br>243 |
|    |                                                                                     | -           |
| 27 | <chem>COCc1cc(C)nc2c1c(n1cccc1)c(s2)c1ccc(cc1)C#N</chem>                            | 20,5<br>256 |

|    |                                                                                 |      |
|----|---------------------------------------------------------------------------------|------|
|    |                                                                                 | -    |
|    |                                                                                 | 23,2 |
| 28 | [O-]C(=O)[C@@H]1CN(C[C@H]1c1ccncc1)c1nnnn1c1cccc1                               | 589  |
|    |                                                                                 | -    |
|    |                                                                                 | 20,7 |
| 29 | O=C(c1c(C)nn(c1n1cccn1)C)NC[C@H]1[NH2+]CCc2c1cccc2                              | 071  |
|    |                                                                                 | -    |
|    |                                                                                 | 22,7 |
| 30 | O=C(c1cnn(c1n1cccc1)c1cccc1F)Nc1ccc2c(c1)OCO2                                   | 862  |
|    |                                                                                 | -    |
|    |                                                                                 | 20,8 |
| 31 | O=C(Nc1cc(C)cc(c1)C)CSc1nnc(n1Cc1cccc1)n1cccc1                                  | 099  |
|    |                                                                                 | -    |
|    |                                                                                 | 21,0 |
| 32 | Cc1cnn(c1)[C@H](c1nnc(n1c1cnn(c1)Cc1cccc1)[S-])C                                | 524  |
|    |                                                                                 | -    |
|    |                                                                                 | 24,7 |
| 33 | Clc1ccc2c(c1)c(=O)nc(n2C1=CCN(CC1)C(=O)Cc1nonc1C)C                              | 638  |
|    |                                                                                 | -    |
|    |                                                                                 | 20,8 |
| 34 | O=C(c1noc(c1)c1ccco1)N1CCN(CC1)c1c(C)nn(c1C)c1cccc1                             | 548  |
|    |                                                                                 | -    |
|    |                                                                                 | 21,6 |
| 35 | O=C(N[C@H](c1c(sc2c1CCCC2)n1cccc1)C)Nc1cccc(c1)Br                               | 433  |
|    |                                                                                 | -    |
|    |                                                                                 | 22,0 |
| 36 | Cc1ccc(cc1)c1[nH+]c(c1n1c1sc(nc1c1cccc1)c1cccc1)c1cccc1                         | 427  |
|    |                                                                                 | -    |
|    |                                                                                 | 22,0 |
| 37 | CCc1nc(=O)c2c(n1C1=CCN(CC1)C(=O)C[C@H]1C(=O)NCC[N@H+]1C)cccc2                   | 768  |
|    |                                                                                 | -    |
|    |                                                                                 | 21,0 |
| 38 | C[C@@H]1CCCN(C1)C(=O)[C@@H]1CCN(CC1)C1=NS(=O)(=O)C(=C1C)c1ccc(c(c1)C)C          | 378  |
|    |                                                                                 | -    |
|    |                                                                                 | 21,1 |
| 39 | CCS(=O)(=O)c1sc(c(n1)S(=O)(=O)c1ccc(cc1)Cl)N1CCCCC1                             | 373  |
|    |                                                                                 | -    |
|    |                                                                                 | 20,8 |
| 40 | Clc1ccc(cc1)S(=O)(=O)NCc1c(n2cccc2)n(c(c1C)C)Cc1cccc1                           | 832  |
|    |                                                                                 | -    |
|    |                                                                                 | 25,5 |
| 41 | Cc1nnc(o1)[C@]12COC[C@@H]2CN(C1)c1nc2c(n1C)cccc2                                | 332  |
|    |                                                                                 | -    |
|    |                                                                                 | 21,8 |
| 42 | O=C(N1CCN(CC1)c1c(C)nn(c1C)[C@@H]1CCS(=O)(=O)C1)CCc1c(C)noc1C                   | 208  |
|    |                                                                                 | -    |
|    |                                                                                 | 20,9 |
| 43 | CC(=O)Nc1ccc(cc1)NC(=O)c1cnn(c1n1cccc1)c1cccc1                                  | 442  |
|    |                                                                                 | -    |
|    |                                                                                 | 20,9 |
| 44 | O=C(Cn1c(=O)n(c2c1cccc2)C1=CCCC1)NCc1ccc(cc1)NC(=O)C                            | 659  |
|    |                                                                                 | -    |
|    |                                                                                 | 21,0 |
| 45 | O=C(Nc1ccc2c(c1)OCO2)CSc1nnc(n1c1ccc(cc1)C)N1CCCC1                              | 771  |
|    |                                                                                 | -    |
|    |                                                                                 | 21,5 |
| 46 | NC(=O)C1CCN(CC1)C(=O)Cn1nc(C)c2c(c1=O)c(n1cccc1)n(n2)c1ccc(cc1)Cl               | 932  |
|    |                                                                                 | -    |
|    |                                                                                 | 20,5 |
| 47 | COc1cc(C)c(c(c1)C)S(=O)(=O)Nc1c(C)n(n(c1=O)c1cccc1)C                            | 389  |
|    |                                                                                 | -    |
|    |                                                                                 | 24,0 |
| 48 | S=C(NC(=O)c1cccc2c1cccc2)Nc1c(cnn1c1ccc(cc1)S(=O)(=O)N)C(=O)N                   | 096  |
|    |                                                                                 | -    |
|    |                                                                                 | 21,6 |
| 49 | O=C(N=c1[nH]c2c([nH]1)cccc2)NC[C@@H]1CCC[C@H](C1)CNC(=O)N=c1[nH]c2c([nH]1)cccc2 | 642  |

|    |                                                                                                                                                                    |      |
|----|--------------------------------------------------------------------------------------------------------------------------------------------------------------------|------|
|    |                                                                                                                                                                    | -    |
|    |                                                                                                                                                                    | 23,3 |
| 50 | <chem>O=C(c1c(/N=C/c2c3ccccc3cc3c2cccc3)sc2c1CCCC2)NCc1cccc1</chem>                                                                                                | 325  |
|    |                                                                                                                                                                    | -    |
|    |                                                                                                                                                                    | 20,6 |
| 51 | <chem>O=C(c1ccc(cc1)S(=O)(=O)N1CCOCC1)N1CCN(CC1)C1=NS(=O)(=O)c2c1cccc2</chem>                                                                                      | 105  |
|    |                                                                                                                                                                    | -    |
|    |                                                                                                                                                                    | 22,4 |
| 52 | <chem>CCOC(=O)N1CCC(CC1)NC(=O)c1nnn(c1n1cccc1)Cc1cccc1</chem>                                                                                                      | 857  |
|    |                                                                                                                                                                    | -    |
|    |                                                                                                                                                                    | 21,2 |
| 53 | <chem>O=C(c1cccc(c1)S(=O)(=O)Nc1c(C)n(n(c1=O)c1cccc1)C)Nc1cccc1C</chem>                                                                                            | 497  |
|    |                                                                                                                                                                    | -    |
|    |                                                                                                                                                                    | 22,8 |
| 54 | <chem>c1ccc(nc1)c1noc(n1)[C@@H]1CCCN1c1nnnn1c1cccc1</chem>                                                                                                         | 455  |
|    |                                                                                                                                                                    | -    |
|    |                                                                                                                                                                    | 23,2 |
| 55 | <chem>O=C([C@H]1CCCN(C1)c1nnc(s1)n1c(C)ccc1C)NCc1cccc1Cl</chem>                                                                                                    | 297  |
|    |                                                                                                                                                                    | -    |
|    |                                                                                                                                                                    | 21,0 |
| 56 | <chem>O=C(c1nnn(c1n1cccc1)c1cccc1)Nc1cnccc1C</chem>                                                                                                                | 582  |
|    |                                                                                                                                                                    | -    |
|    |                                                                                                                                                                    | 22,4 |
| 57 | <chem>O[C@H]1CCN(C1)c1nc2c(n1C)ccc(c2)C(=O)NCCc1ccc(o1)C</chem>                                                                                                    | 271  |
|    |                                                                                                                                                                    | -    |
|    |                                                                                                                                                                    | 22,2 |
| 58 | <chem>S=C1N[C@@H]([C@@H](N1c1ccc(cc1)OC1CCCC1)c1cc(n(c1C)c1nccs1)C)c1ccccn1</chem>                                                                                 | 097  |
|    |                                                                                                                                                                    | -    |
|    |                                                                                                                                                                    | 22,7 |
| 59 | <chem>Cc1ccc(cc1)n1c(c2ccccc2)c(cc1c1cccc1)/C=N/c1sc2c(c1C(=O)NC1CCCCC1)CCCC2</chem>                                                                               | 301  |
|    |                                                                                                                                                                    | -    |
|    |                                                                                                                                                                    | 29,0 |
| 60 | <chem>[NH3+][C][C@@H]1O[C@H](O[C@@H]2[C@H]([NH3+])C[C@@H]([C@@H]([C@@H]2O)O[C@H]2O[C@@H](CO)[C@H]([C@@H]([C@H]2O)[NH3+])O)[NH3+])[C@@H]([C@@H]([C@@H]1O)O)O</chem> | 171  |
|    |                                                                                                                                                                    | -    |
|    |                                                                                                                                                                    | 23,2 |
| 61 | <chem>COc1ccc(cc1)c1nc(sc1C)n1c(C)c2c(c1C)c(C)nnc2C</chem>                                                                                                         | 024  |
|    |                                                                                                                                                                    | -    |
|    |                                                                                                                                                                    | 23,9 |
| 62 | <chem>Cc1cccc(c1)N1C(=S)N[C@@H]([C@@H]1c1cc(n(c1C)c1nccs1)C)c1ccccn1</chem>                                                                                        | 945  |
|    |                                                                                                                                                                    | -    |
|    |                                                                                                                                                                    | 26,6 |
| 63 | <chem>S=C(Nc1c(C)nn(c1C)Cc1cccc1C)N[C@@H]1C[C@H]2CC[C@@H](C1)[N@@H+]2C</chem>                                                                                      | 451  |
|    |                                                                                                                                                                    | -    |
|    |                                                                                                                                                                    | 20,5 |
| 64 | <chem>OCCNc1nc(=O)n(cc1C)c1nc(sc1c1cccc1)c1cccc1</chem>                                                                                                            | 596  |
|    |                                                                                                                                                                    | -    |
|    |                                                                                                                                                                    | 23,1 |
| 65 | <chem>O=C(Nc1ccc2c(c1)OCO2)CSc1nnc(n1Cc1cccc1)N1CCOCC1</chem>                                                                                                      | 729  |
|    |                                                                                                                                                                    | -    |
|    |                                                                                                                                                                    | 29,3 |
| 66 | <chem>Cc1sc(nc1c1ccc(cc1)Oc1cccc1)n1c(C)c2c(c1C)c(C)nnc2C</chem>                                                                                                   | 019  |
|    |                                                                                                                                                                    | -    |
|    |                                                                                                                                                                    | 22,9 |
| 67 | <chem>CCOc1ccc(cc1)S(=O)(=O)N(c1c(C)n(n(c1=O)c1cccc1)C)Cc1ccc(cc1)C</chem>                                                                                         | 799  |
|    |                                                                                                                                                                    | -    |
|    |                                                                                                                                                                    | 22,5 |
| 68 | <chem>O=C(C1CCN(CC1)c1nnc(s1)n1c(C)ccc1C)NCc1cccc(c1)Cl</chem>                                                                                                     | 213  |
|    |                                                                                                                                                                    | -    |
|    |                                                                                                                                                                    | 23,5 |
| 69 | <chem>Clc1ccc(cc1)N1C(=S)N[C@@H]([C@@H]1c1cc(n(c1C)c1nccs1)C)c1ccccn1</chem>                                                                                       | 559  |
|    |                                                                                                                                                                    | -    |
|    |                                                                                                                                                                    | 30,9 |
| 70 | <chem>Clc1ccc(cc1)n1nc(/c(=N/C(=O)c2nnn(c2c2ccccc2)c2ccccc2)/s1)C(=O)N1CCOCC1</chem>                                                                               | 678  |
|    |                                                                                                                                                                    | -    |
|    |                                                                                                                                                                    | 22,5 |
| 71 | <chem>COc1cc(ccc1O)c1nc2n(c1Nc1cccc(c1)Cl)c(C)ccc2</chem>                                                                                                          | 591  |



|    |                                                                                        |      |
|----|----------------------------------------------------------------------------------------|------|
|    |                                                                                        | -    |
|    |                                                                                        | 22,9 |
| 72 | <chem>S=C1N[C@H]([C@@H](N1c1ccc(c(c1)C)C)c1cc(n(c1C)c1nccs1)C)c1ccccc1</chem>          | 884  |
|    |                                                                                        | -    |
|    |                                                                                        | 21,5 |
| 73 | <chem>COc1cc(ccc1NS(=O)(=O)C)N1C(=S)N[C@H]([C@@H]1c1cc(n(c1C)c1nccs1)C)c1ccccc1</chem> | 062  |
|    |                                                                                        | -    |
|    |                                                                                        | 24,5 |
| 74 | <chem>COc1ccc(cc1)c1[nH]n/c(=N/C(=O)Cc2ccccc2)/c1)[C@H]1CCS(=O)(=O)C1</chem>           | 127  |
|    |                                                                                        | -    |
|    |                                                                                        | 23,0 |
| 75 | <chem>Cc1ccc(cc1)N1C(=S)N[C@@H]([C@@H]1c1cc(n(c1C)c1nccs1)C)c1ccccc1</chem>            | 373  |
|    |                                                                                        | -    |
|    |                                                                                        | 21,0 |
| 76 | <chem>COc1cccc1Nc1c(nc2n1c(C)ccc2)c1ccc(cc1)O</chem>                                   | 136  |
|    |                                                                                        | -    |
|    |                                                                                        | 23,0 |
| 77 | <chem>Fc1ccc(cc1)[C@H]1C(=C(C(=O)N1c1c(C)n(n(c1=O)c1ccccc1)C)O)C(=O)c1ccc(cc1)C</chem> | 111  |
|    |                                                                                        | -    |
|    |                                                                                        | 22,4 |
| 78 | <chem>S=C1N[C@H]([C@@H](N1c1ccc(c(c1)C)Br)c1cc(n(c1C)c1nccs1)C)c1ccccc1</chem>         | 476  |
|    |                                                                                        | -    |
|    |                                                                                        | 20,8 |
| 79 | <chem>COc1cc(ccc1OC)C(=O)/N=c/1\cc([nH]n1[C@H]1CCS(=O)(=O)C1)c1ccccc1</chem>           | 044  |
|    |                                                                                        | -    |
|    |                                                                                        | 22,6 |
| 80 | <chem>N#Cc1c(/N=C/c2c(OCc3ccc(cc3)Cl)ccc3c2cccc3)sc2c1CCCC2</chem>                     | 305  |
|    |                                                                                        | -    |
|    |                                                                                        | 22,2 |
| 81 | <chem>Cc1ccc(cc1)N1C(=S)N[C@H]([C@@H]1c1cc(n(c1C)c1nccs1)C)c1ccccc1</chem>             | 832  |
|    |                                                                                        | -    |
|    |                                                                                        | 22,4 |
| 82 | <chem>Oc1cccc1N1C(=S)N[C@H]([C@H]1c1cc(n(c1C)c1nccs1)C)c1ccccc1</chem>                 | 993  |
|    |                                                                                        | -    |
|    |                                                                                        | 22,1 |
| 83 | <chem>S=C1N[C@H]([C@@H](N1c1cccc1)c1cc(n(c1C)c1nccs1)C)c1ccccc1</chem>                 | 985  |
|    |                                                                                        | -    |
|    |                                                                                        | 22,1 |
| 84 | <chem>S=C1N[C@H]([C@@H](N1c1ccc(c(c1)C)F)c1cc(n(c1C)c1nccs1)C)c1ccccc1</chem>          | 438  |
|    |                                                                                        | -    |
|    |                                                                                        | 23,0 |
| 85 | <chem>S=C1N[C@H]([C@@H](N1C1CCCC1)c1cc(n(c1C)c1nccs1)C)c1ccccc1</chem>                 | 523  |
|    |                                                                                        | -    |
|    |                                                                                        | 21,6 |
| 86 | <chem>S=C(Nc1c(cnn1c1ccc(cc1C)C)C(=O)N)NC(=O)c1ccc(c(c1)S(=O)(=O)N1CCOCC1)Cl</chem>    | 727  |
|    |                                                                                        | -    |
|    |                                                                                        | 20,6 |
| 87 | <chem>COc1ccc(cc1)N1C(=S)N[C@H]([C@@H]1c1cc(n(c1C)c1nccs1)C)c1ccccc1</chem>            | 732  |
|    |                                                                                        | -    |
|    |                                                                                        | 23,6 |
| 88 | <chem>Fc1ccc(cc1)N1C(=S)N[C@@H]([C@H]1c1cc(n(c1C)c1nccs1)C)c1ccccc1</chem>             | 303  |
|    |                                                                                        | -    |
|    |                                                                                        | 23,7 |
| 89 | <chem>S=C1N[C@@H]([C@@H](N1c1ccc(cc1)Oc1ccccc1)c1cc(n(c1C)c1nccs1)C)c1ccccc1</chem>    | 284  |
|    |                                                                                        | -    |
|    |                                                                                        | 22,5 |
| 90 | <chem>Cc1sc(nc1c1ccc(c(c1)C)C)n1c(C)c2c(c1C)c(C)nnc2C</chem>                           | 38   |
|    |                                                                                        | -    |
|    |                                                                                        | 20,9 |
| 91 | <chem>Cc1cccc(c1)c1nn(cc1C(=O)N(c1nc2c(s1)cccc2)C[C@H]1CCCCO1)c1ccccc1</chem>          | 917  |
|    |                                                                                        | -    |
|    |                                                                                        | 23,8 |
| 92 | <chem>COc1cc(ccc1OC)c1c/c(=N\c2sc(c(n2)c2cccs2)C)/c2c(o1)cccc2</chem>                  | 736  |
|    |                                                                                        | -    |
|    |                                                                                        | 23,9 |
| 93 | <chem>N#Cc1c(/N=C/c2cn(c3c2cccc3)Cc2ccc3c(c2)cccc3)sc2c1CC[N@@H+](C2)C</chem>          | 072  |

|     |                                                                                                                                                                                      |             |
|-----|--------------------------------------------------------------------------------------------------------------------------------------------------------------------------------------|-------------|
|     |                                                                                                                                                                                      | -           |
|     |                                                                                                                                                                                      | 21,4        |
| 94  | <chem>Cc1ccnc(n1)Sc1oc(cc1Br)/C=N/c1sc2c(c1C(=O)Nc1ccccc1)CCCC2</chem>                                                                                                               | 688         |
|     |                                                                                                                                                                                      | -           |
|     |                                                                                                                                                                                      | 25,8        |
| 95  | <chem>O=C(Nc1cc(C)ccc1C)CCN1C(=S)N[C@H]([C@@H]1c1cc(n(c1C)c1nccs1)C)c1ccccc1</chem>                                                                                                  | 391         |
|     |                                                                                                                                                                                      | -           |
|     |                                                                                                                                                                                      | 23,9        |
| 96  | <chem>Oc1ccccc1N1C(=S)N[C@@H]([C@H]1c1cc(n(c1C)c1nccs1)C)c1ccccc1</chem>                                                                                                             | 707         |
|     |                                                                                                                                                                                      | -           |
|     |                                                                                                                                                                                      | 20,7        |
| 97  | <chem>COCC[NH+]1CCN(CC1)C(=O)c1cccc(c1)c1nn(c(n1)N(C)C)C</chem>                                                                                                                      | 663         |
|     |                                                                                                                                                                                      | -           |
|     |                                                                                                                                                                                      | 20,9        |
| 98  | <chem>COc1ccc(cc1)c1cc(nn1[C@H]1CCS(=O)(=O)C1)C(=O)N=c1[nH]cc[nH]1</chem>                                                                                                            | 064         |
|     |                                                                                                                                                                                      | -           |
|     |                                                                                                                                                                                      | 25,3        |
| 99  | <chem>O=C1N[C@@H](C(=O)N1CC(=O)c1cc(n(c1C)c1nccs1)C)Cc1c[nH]c2c1cccc2</chem>                                                                                                         | 222         |
|     |                                                                                                                                                                                      | -           |
|     |                                                                                                                                                                                      | 21,0        |
| 100 | <chem>S=C1N[C@H]([C@@H](N1c1ccc2c(c1)OCO2)c1cc(n(c1C)c1nccs1)C)c1ccccc1</chem>                                                                                                       | 808         |
|     |                                                                                                                                                                                      | -           |
|     |                                                                                                                                                                                      | 22,1        |
| 101 | <chem>Brc1ccc(cc1)S(=O)(=O)Nc1nc2cccc2nc1n1ccc(=NC(=O)c2cccc2)cc1</chem>                                                                                                             | 721         |
|     |                                                                                                                                                                                      | -           |
|     |                                                                                                                                                                                      | 20,9        |
| 102 | <chem>Clc1ccc(cc1)N1C(=S)N[C@H]([C@H]1c1cc(n(c1C)c1nccs1)C)c1ccccc1</chem>                                                                                                           | 23          |
|     |                                                                                                                                                                                      | -           |
|     |                                                                                                                                                                                      | 21,8        |
| 103 | <chem>Oc1ccccc1N1C(=S)N[C@@H]([C@H]1c1cc(n(c1C)c1nccs1)C)c1ccccc1</chem>                                                                                                             | 087         |
|     |                                                                                                                                                                                      | -           |
|     |                                                                                                                                                                                      | 25,7        |
| 104 | <chem>Clc1ccc(cc1)NC(=O)c1c(/N=C/c2ccc3c(c2)Sc2c(N3C)cccc2)sc2c1CC[C@H](C2)C(C)(C)C</chem>                                                                                           | 525         |
|     |                                                                                                                                                                                      | -           |
|     |                                                                                                                                                                                      | 21,3        |
| 105 | <chem>COc1cccc(c1)N(C(=O)c1ccc(cc1)NC(=O)C)c1nc2c(s1)cccc2</chem>                                                                                                                    | 127         |
|     |                                                                                                                                                                                      | -           |
|     |                                                                                                                                                                                      | 24,6        |
| 106 | <chem>O=C(Nc1ccc(cc1)C)CCN1C(=S)N[C@H]([C@@H]1c1cc(n(c1C)c1nccs1)C)c1ccccc1</chem>                                                                                                   | 782         |
|     |                                                                                                                                                                                      | -           |
|     |                                                                                                                                                                                      | 23,6        |
| 107 | <chem>COc1cccc(c1O)/C=N/c1c(C)n(n(c1=O)c1ccccc1)C</chem>                                                                                                                             | 146         |
|     |                                                                                                                                                                                      | -           |
|     |                                                                                                                                                                                      | 21,9        |
| 108 | <chem>Clc1ccc(c(c1)Cl)COc1ccccc1/C=N/c1sc2c(c1C(=O)NCc1ccccc1)CCCC2</chem>                                                                                                           | 44          |
|     |                                                                                                                                                                                      | -           |
|     |                                                                                                                                                                                      | 22,0        |
| 109 | <chem>Oc1ccccc1/C=N/C1=CC=C(CC1)Cc1ccc(cc1)/N=C/c1ccccc1O</chem>                                                                                                                     | 927         |
|     |                                                                                                                                                                                      | -           |
|     |                                                                                                                                                                                      | 21,7        |
| 110 | <chem>Clc1ccc2c(c1)oc(=O)n2CC(=O)c1cc(n(c1C)c1nccs1)C</chem>                                                                                                                         | 132         |
|     |                                                                                                                                                                                      | -           |
|     |                                                                                                                                                                                      | 22,9        |
| 111 | <chem>O=C(N=c1[nH]c2c([nH]1)cccc2)CSCc1nc2sc(cc2c(=O)[nH]1)C</chem>                                                                                                                  | 56          |
|     |                                                                                                                                                                                      | -           |
| 112 | <chem>C[NH2+][C@@H]1[C@@H](O[C@H]2[C@H]([C@H]1O)O[C@H]([C@H](C2)[NH3+])O[C@@H]1[C@H]([NH3+])C[C@@H]([C@@H]([C@@H]1O)O)[NH3+])O[C@@H]1O[C@H](CO)[C@@H]([C@H]([C@@H]1O)O)[NH3+]</chem> | 31,2<br>203 |
|     |                                                                                                                                                                                      | -           |
|     |                                                                                                                                                                                      | 26,7        |
| 113 | <chem>O=C(N1CCN(CC1)S(=O)(=O)c1ccc(cc1)F)CCC(=O)N=c1[nH]c2c([nH]1)cccc2</chem>                                                                                                       | 982         |
|     |                                                                                                                                                                                      | -           |
|     |                                                                                                                                                                                      | 21,3        |
| 114 | <chem>N#Cc1c(/N=C/c2ccc(s2)c2cccs2)sc2c1CC[C@H](C2)C</chem>                                                                                                                          | 807         |
|     |                                                                                                                                                                                      | -           |
|     |                                                                                                                                                                                      | 21,4        |
| 115 | <chem>S=C1N[C@H]([C@@H](N1c1ccc(cc1)Oc1ccccc1)c1cc(n(c1C)c1nccs1)C)c1ccccc1</chem>                                                                                                   | 658         |

|     |                                                                                                                                                                 |      |
|-----|-----------------------------------------------------------------------------------------------------------------------------------------------------------------|------|
|     |                                                                                                                                                                 | -    |
|     |                                                                                                                                                                 | 21,2 |
| 116 | <chem>N#Cc1c(/N=C/c2ccc(s2)c2cccs2)sc2c1CC[C@@H](C2)C</chem>                                                                                                    | 289  |
|     |                                                                                                                                                                 | -    |
|     |                                                                                                                                                                 | 22,0 |
| 117 | <chem>CC(=O)N[C@H](C(=O)NC1CCN(CC1)c1nnnn1c1cccc1)Cc1cccc1</chem>                                                                                               | 681  |
|     |                                                                                                                                                                 | -    |
|     |                                                                                                                                                                 | 22,1 |
| 118 | <chem>O=C(c1snnc1C)/N=c/1\cc([nH]n1[C@H]1CCS(=O)(=O)C1)c1cccc1</chem>                                                                                           | 781  |
|     |                                                                                                                                                                 | -    |
|     |                                                                                                                                                                 | 22,9 |
| 119 | <chem>Clc1ccc(cc1)NC(=O)c1c(/N=C/c2ccc(o2)N2CCOCC2)sc2c1CC[C@H](C2)C(C)(C)C</chem>                                                                              | 963  |
|     |                                                                                                                                                                 | -    |
|     |                                                                                                                                                                 | 21,1 |
| 120 | <chem>N#Cc1cccc1COc1ccc(cc1/C=N/c1sc2c(c1C(=O)Nc1ccc(cc1)Cl)CC[C@H](C2)C(C)(C)C)Br</chem>                                                                       | 32   |
|     |                                                                                                                                                                 | -    |
|     |                                                                                                                                                                 | 24,1 |
| 121 | <chem>C[C@H]1C[C@H](C)CN(C1)S(=O)(=O)c1cccc(c1)C(=O)N=C(c1ccc(cc1)N(C)C)c1ccc(cc1)N(C)C</chem>                                                                  | 544  |
|     |                                                                                                                                                                 | -    |
|     |                                                                                                                                                                 | 22,8 |
| 122 | <chem>O=C(Nc1ccc(cc1)C)CCN1C(=S)N[C@@H]([C@H]1c1cc(n(c1C)c1nccs1)C)c1ccccn1</chem>                                                                              | 567  |
|     |                                                                                                                                                                 | -    |
|     |                                                                                                                                                                 | 20,5 |
| 123 | <chem>N#Cc1c(/N=C/c2c(OCc3ccc(cc3)Br)ccc3c2cccc3)sc2c1CC[C@H](C2)C(C)(C)C</chem>                                                                                | 024  |
|     |                                                                                                                                                                 | -    |
|     |                                                                                                                                                                 | 23,0 |
| 124 | <chem>COc1ccc(cc1)c1c/c(=N\c2sc(c(n2)c2cccc2)C)/c2c(o1)cccc2</chem>                                                                                             | 855  |
|     |                                                                                                                                                                 | -    |
|     | <chem>C[NH2+][C@H]([C@@H]1CC[C@@H]([C@@H](O1)O[C@@H]1[C@H]([NH3+])C[C@@H]([C@@H]([C@@H]1O)O[C@H]1OC[C@]([C@H]([C@H]1O)[NH2+])C(O)[NH3+])[NH3+])C</chem>         | 21,1 |
| 125 |                                                                                                                                                                 | 49   |
|     |                                                                                                                                                                 | -    |
|     |                                                                                                                                                                 | 21,4 |
| 126 | <chem>Clc1ccc(cc1)S(=O)(=O)c1ccc(o1)C(=O)/N=c\1/s[nH]c(n1)c1cccc1</chem>                                                                                        | 012  |
|     |                                                                                                                                                                 | -    |
|     |                                                                                                                                                                 | 21,3 |
| 127 | <chem>O=C(Nc1ccc(cc1)C)CCN1C(=S)N[C@H]([C@H]1c1cc(n(c1C)c1nccs1)C)c1ccccn1</chem>                                                                               | 416  |
|     |                                                                                                                                                                 | -    |
|     |                                                                                                                                                                 | 23,1 |
| 128 | <chem>O=C(c1nn(C)c(=O)c2c1cccc2)/N=c/1\cc([nH]n1[C@@H]1CCS(=O)(=O)C1)C</chem>                                                                                   | 844  |
|     |                                                                                                                                                                 | -    |
|     |                                                                                                                                                                 | 21,3 |
| 129 | <chem>COCC(=O)Nc1ccc(cc1Cl)N1C(=S)N[C@H]([C@@H]1c1cc(n(c1C)c1nccs1)C)c1ccccn1</chem>                                                                            | 439  |
|     |                                                                                                                                                                 | -    |
|     |                                                                                                                                                                 | 25,5 |
| 130 | <chem>O=C(c1cc(=O)n(c2c1cccc2)C)/N=c/1\cc([nH]n1[C@@H]1CCS(=O)(=O)C1)C</chem>                                                                                   | 837  |
|     |                                                                                                                                                                 | -    |
|     | <chem>[NH3+]C[C@@H]1O[C@H](O[C@H]2[C@H]([NH3+])C[C@H]([C@H]([C@H]2O)O[C@H]2O[C@@H](CO)[C@H]([C@H]([C@H]2O)[NH3+])O)[NH3+])[C@@H](C[C@@H]1O)[NH3+]</chem>        | 27,7 |
| 131 |                                                                                                                                                                 | 312  |
|     |                                                                                                                                                                 | -    |
|     |                                                                                                                                                                 | 21,7 |
| 132 | <chem>O=C(c1sc(c(c1)c1cccc1)N1CCOCC1)Nc1ccc(cc1)n1cnnn1</chem>                                                                                                  | 378  |
|     |                                                                                                                                                                 | -    |
|     |                                                                                                                                                                 | 20,6 |
| 133 | <chem>CCCS(=O)(=O)c1nnc(s1)/N=C(/COc1ccc(cc1)Br)\O</chem>                                                                                                       | 256  |
|     |                                                                                                                                                                 | -    |
|     |                                                                                                                                                                 | 20,8 |
| 134 | <chem>Clc1ccc(cc1)NC(=O)c1c(/N=C/c2c(OCc3ccc(cc3)Br)ccc3c2cccc3)sc2c1CC[C@H](C2)C(C)(C)C</chem>                                                                 | 778  |
|     |                                                                                                                                                                 | -    |
|     |                                                                                                                                                                 | 20,9 |
| 135 | <chem>O=C1N(c2ccc3c(c2)sc(n3)Sc2ccc(o2)/C=N/c2c(C)n(n(c2=O)c2cccc2)C)C(=O)c2c1cccc2</chem>                                                                      | 96   |
|     |                                                                                                                                                                 | -    |
|     | <chem>[NH3+]C[C@@H]1O[C@@H](O[C@@H]2[C@H]([NH3+])C[C@@H]([C@H]([C@H]2O)O[C@@H]2O[C@H](CO)[C@@H]([C@@H]([C@@H]2O)[NH3+])O)[NH3+])[C@@H]([C@H]([C@H]1O)O)O</chem> | 27,5 |
| 136 |                                                                                                                                                                 | 638  |
|     |                                                                                                                                                                 | -    |
|     |                                                                                                                                                                 | 22,3 |
| 137 | <chem>O=C(c1cccc(c1)Nc1ncccn1)/N=c/1\cc([nH]n1[C@@H]1CCS(=O)(=O)C1)C</chem>                                                                                     | 551  |

|     |                                                                                 |      |
|-----|---------------------------------------------------------------------------------|------|
|     |                                                                                 | -    |
|     |                                                                                 | 21,8 |
| 138 | <chem>Fc1ccc2c(c1)cc(n2C)C(=O)/N=c/1\cc([nH]n1[C@H]1CCS(=O)(=O)C1)C</chem>      | 077  |
|     |                                                                                 | -    |
|     |                                                                                 | 20,7 |
| 139 | <chem>CCOc1ccc(cc1)N1C(=S)N[C@H]([C@H]1c1cc(n(c1C)c1nccs1)C)c1ccccc1</chem>     | 452  |
|     |                                                                                 | -    |
|     |                                                                                 | 21,0 |
| 140 | <chem>O1CCN(CC1)c1nnc(n1Cc1ccccc1)SCc1noc(c1)c1ccco1</chem>                     | 275  |
|     |                                                                                 | -    |
|     |                                                                                 | 22,4 |
| 141 | <chem>CCOc1cc(/C=N/c2c(C)n(n(c2=O)c2ccccc2)C)ccc1O</chem>                       | 696  |
|     |                                                                                 | -    |
|     |                                                                                 | 20,7 |
| 142 | <chem>O=C(c1c(/N=C/c2c(O)ccc3c2cccc3)sc2c1CCCC2)NCc1ccccc1</chem>               | 485  |
|     |                                                                                 | -    |
|     |                                                                                 | 21,2 |
| 143 | <chem>Oc1ccc(cc1)n1nnnc1SCC(=O)c1cc(n(c1C)c1nccs1)C</chem>                      | 242  |
|     |                                                                                 | -    |
|     |                                                                                 | 23,8 |
| 144 | <chem>COCCn1ccc2c1cccc2C(=O)/N=c/1\cc([nH]n1[C@H]1CCS(=O)(=O)C1)C</chem>        | 236  |
|     |                                                                                 | -    |
|     |                                                                                 | 20,6 |
| 145 | <chem>S=C(Nc1nnc(c(=O)[nH]1)C)/N=C/c1ccc(cc1)N(C)C</chem>                       | 842  |
|     |                                                                                 | -    |
|     |                                                                                 | 20,5 |
| 146 | <chem>N#Cc1ccccc1NC(=O)CSc1nc2cccc2c(=O)n1c1[n-]cnn1</chem>                     | 326  |
|     |                                                                                 | -    |
|     |                                                                                 | 20,6 |
| 147 | <chem>Brc1cc(oc1Sc1ccccc1)/C=N/c1sc2c(c1C(=O)NCc1ccco1)CCCC2</chem>             | 364  |
|     |                                                                                 | -    |
|     |                                                                                 | 20,8 |
| 148 | <chem>COc1cccc(c1)N(C(=O)c1ccncc1)c1nc2c(s1)cccc2</chem>                        | 889  |
|     |                                                                                 | -    |
|     |                                                                                 | 25,6 |
| 149 | <chem>COc1cc(ccc1O)c1nc2n(c1/N=C/c1cn(c3c1cccc3)Cc1ccccc1Cl)cccc2</chem>        | 91   |
|     |                                                                                 | -    |
|     |                                                                                 | 32,5 |
| 150 | <chem>O=C(c1cccc(c1)N1CCCS1(=O)=O)Nc1cccc(c1)c1nnc2n1CCCCC2</chem>              | 13   |
|     |                                                                                 | -    |
|     |                                                                                 | 23,5 |
| 151 | <chem>C#CCn1/c(=N/C(=O)c2ccc3c(c2)CCCC3)/sc2c1ccc(c2)S(=O)(=O)N</chem>          | 295  |
|     |                                                                                 | -    |
|     |                                                                                 | 22,5 |
| 152 | <chem>Oc1cc(C)c(c(c1O)/C=N/c1c(=O)n(n(c1C)C)c1ccccc1</chem>                     | 703  |
|     |                                                                                 | -    |
|     |                                                                                 | 22,7 |
| 153 | <chem>COc1ccc2c(c1)s/c(=N\C(=O)CCCN1sc3c(c1=O)cccc3)/[nH]2</chem>               | 957  |
|     |                                                                                 | -    |
|     |                                                                                 | 24,5 |
| 154 | <chem>Clc1ccc(cc1)NC(=O)c1c(/N=C/c2cc(c(o2)Sc2ncccn2)Br)sc2c1CCCC2</chem>       | 014  |
|     |                                                                                 | -    |
|     |                                                                                 | 21,0 |
| 155 | <chem>Clc1cccc(n1)C(=O)/N=c/1\cc([nH]n1[C@H]1CCS(=O)(=O)C1)c1ccccc1</chem>      | 956  |
|     |                                                                                 | -    |
|     |                                                                                 | 22,2 |
| 156 | <chem>COC(=O)c1c(NC(=S)NCc2cn(nc2c2cccc2)c2cccc2)sc2c1CCCC2</chem>              | 075  |
|     |                                                                                 | -    |
|     |                                                                                 | 21,9 |
| 157 | <chem>Cc1ccc(cc1)c1n[nH]cc1/C=N/c1sccc1C(=O)Nc1ccccc1C</chem>                   | 494  |
|     |                                                                                 | -    |
|     |                                                                                 | 20,9 |
| 158 | <chem>O=C([C@H]1CCCN(C1)c1nnc(s1)n1c(C)ccc1C)NCCC[NH+]1CCCCC1</chem>            | 396  |
|     |                                                                                 | -    |
|     |                                                                                 | 20,7 |
| 159 | <chem>O=C(Nc1ccccc1C)CCN1C(=S)N[C@H]([C@H]1c1cc(n(c1C)c1nccs1)C)c1ccccc1</chem> | 708  |

|     |                                                                                       |      |
|-----|---------------------------------------------------------------------------------------|------|
|     |                                                                                       | -    |
|     |                                                                                       | 22,8 |
| 160 | <chem>Cc1ccc(cc1)N1[NH2+][C@](NC1=S)(C)c1ccccc1Br</chem>                              | 459  |
|     |                                                                                       | -    |
|     |                                                                                       | 29,0 |
| 161 | <chem>COc1ccc(cc1S(=O)(=O)NCC1ccccc1)C(=O)Nc1c(Cl)cccc1Cl</chem>                      | 161  |
|     |                                                                                       | -    |
|     |                                                                                       | 24,7 |
| 162 | <chem>O[C@H](C[NH+](C1CCCCC1)C1CCCCC1)Cn1c(c2ccccc2)c(c2c1c1ccccc1cc2)c1ccccc1</chem> | 942  |
|     |                                                                                       | -    |
|     |                                                                                       | 22,0 |
| 163 | <chem>O=C(c1cc(nc2c1c(C)no2)C(C)C)N=c1[nH]c2c([nH]1)cccc2</chem>                      | 301  |
|     |                                                                                       | -    |
|     |                                                                                       | 25,1 |
| 164 | <chem>O=C(c1c(/N=C/c2c[nH]c3c2cccc3)sc2c1CCCC2)Nc1ccccc1</chem>                       | 821  |
|     |                                                                                       | -    |
|     |                                                                                       | 20,7 |
| 165 | <chem>OCCCN1C(=S)N[C@H]([C@@H]1c1cc(n(c1C)c1nccs1)C)c1ccccc1</chem>                   | 201  |
|     |                                                                                       | -    |
|     |                                                                                       | 20,5 |
| 166 | <chem>Clc1ccc(cc1)c1noc(n1)CCCS1nnc(n1Cc1ccccc1)N1CCOCC1</chem>                       | 987  |
|     |                                                                                       | -    |
|     |                                                                                       | 22,0 |
| 167 | <chem>COc1cc(ccc1O)c1nc2n(c1/N=C/c1ccc(o1)c1cccc(c1C)Cl)cccc2</chem>                  | 229  |
|     |                                                                                       | -    |
|     |                                                                                       | 21,7 |
| 168 | <chem>O=C(C1CCN(CC1)c1ccc(nn1)Cl)N=c1[nH]c2c([nH]1)cccc2</chem>                       | 947  |
|     |                                                                                       | -    |
|     |                                                                                       | 21,5 |
| 169 | <chem>O=C(c1sc2c(c1N)cccn2)/N=c/1\sc2c([nH]1)cccc2</chem>                             | 002  |
|     |                                                                                       | -    |
|     |                                                                                       | 25,0 |
| 170 | <chem>Clc1ccc(cc1)c1ccc(=O)n(n1)CC(=O)/N=c/1\sc2c([nH]1)cccc2</chem>                  | 465  |
|     |                                                                                       | -    |
|     |                                                                                       | 21,3 |
| 171 | <chem>O=C(c1sc(c(c1N)c1sc2c(n1)cccc2)Nc1ccccc1)c1ccccc1</chem>                        | 489  |
|     |                                                                                       | -    |
|     |                                                                                       | 21,8 |
| 172 | <chem>Clc1ccc(cc1)C(=O)c1sc(c(c1N)c1nc2c(s1)cccc2)Nc1cc(C)ccc1C</chem>                | 297  |
|     |                                                                                       | -    |
|     |                                                                                       | 21,4 |
| 173 | <chem>O/C(=N\c1scc(n1)C[N@H+]1CCc2c(C1)cccc2)/c1cc(=O)c2c(o1)cccc2</chem>             | 759  |
|     |                                                                                       | -    |
|     |                                                                                       | 22,1 |
| 174 | <chem>CCOC(=O)c1ccc(s1)NC(=O)c1cccc(c1)S(=O)(=O)N1CCCc2c1cccc2</chem>                 | 124  |
|     |                                                                                       | -    |
|     |                                                                                       | 23,0 |
| 175 | <chem>O=C1Nc2nc(nn2[C@H](C1)c1ccc(cc1)Cl)/N=C(/COc1ccc2c(c1)cccc2)\O</chem>           | 783  |
|     |                                                                                       | -    |
|     |                                                                                       | 22,2 |
| 176 | <chem>Fc1ccc(cc1)NC(=S)Nc1sc2c(c1C(=O)N)CCCC2</chem>                                  | 44   |
|     |                                                                                       | -    |
|     |                                                                                       | 21,5 |
| 177 | <chem>C[C@@H]1CCc2c(C1)sc(c2C(=O)N)NC(=S)NC(=O)c1sc2c(c1Cl)ccc(c2)Cl</chem>           | 284  |
|     |                                                                                       | -    |
|     |                                                                                       | 22,4 |
| 178 | <chem>COc1ccc(cc1)C(=O)/N=c/1\sn(nc1C(=O)Nc1ccccc1)c1ccc(cc1)Cl</chem>                | 954  |
|     |                                                                                       | -    |
|     |                                                                                       | 21,1 |
| 179 | <chem>CC(NC(=O)c1cccc(c1)Cn1/c(=N/C(=O)c2ccccc2F)/sc(c1C)C)C</chem>                   | 394  |
|     |                                                                                       | -    |
|     |                                                                                       | 23,0 |
| 180 | <chem>Cc1cccc(c1)C(=O)NC(=S)Nc1sc2c(c1C(=O)N)CCCCC2</chem>                            | 945  |
|     |                                                                                       | -    |
|     |                                                                                       | 22,9 |
| 181 | <chem>COc1ccc(cc1)c1[nH]n(/c(=N/C(=O)C(C)C)/c1)[C@H]1CCS(=O)(=O)C1</chem>             | 94   |

|     |                                                                                                                                                                        |             |
|-----|------------------------------------------------------------------------------------------------------------------------------------------------------------------------|-------------|
|     |                                                                                                                                                                        | -           |
| 182 | <chem>C[C@@H]1CCN(CC1)c1ccc(o1)/C=N/c1sc2c(c1C(=O)Nc1cccc1)CCCC2</chem>                                                                                                | 21,9<br>718 |
|     |                                                                                                                                                                        | -           |
| 183 | <chem>CCn1/c(=N/C(=O)c2ccc(cc2)S(=O)(=O)N2C[C@H](C)O[C@H](C2)C)/sc2c1ccc(c2)Cl</chem>                                                                                  | 21,7<br>689 |
|     |                                                                                                                                                                        | -           |
| 184 | <chem>O=C(c1ccoc1C)/N=c/1\[nH]c2c(n1CC[NH+])1CCCCC1)cccc2</chem>                                                                                                       | 24,1<br>678 |
|     |                                                                                                                                                                        | -           |
| 185 | <chem>C1CC[C@H](C[NH2+])1Cc1cnc/c(=N\c2ncc(s2)c2cccc2)/[nH]1</chem>                                                                                                    | 21,8<br>052 |
|     |                                                                                                                                                                        | -           |
| 186 | <chem>Clc1cccc(c1)c1n[nH]/c(=N/C(=O)NCc2n(C)ncc2C2CC2)/s1</chem>                                                                                                       | 21,2<br>698 |
|     |                                                                                                                                                                        | -           |
| 187 | <chem>COC(=O)Nc1c(nc(n1c1sc(nc1c1cccc1)c1cccc1)c1cccc1)c1cccc1</chem>                                                                                                  | 20,6<br>814 |
|     |                                                                                                                                                                        | -           |
| 188 | <chem>Fc1ccc(cc1)c1c[nH]/c(=N\C(=O)c2[nH]nc3c2C[C@H](CC3)C(C)(C)C)/n1C</chem>                                                                                          | 20,6<br>693 |
|     |                                                                                                                                                                        | -           |
| 189 | <chem>Cc1nn(c(c1)C)c1cccc(c1)C(=O)/N=c/1\cc([nH]n1[C@@H]1CCS(=O)(=O)C1)C</chem>                                                                                        | 22,0<br>209 |
|     |                                                                                                                                                                        | -           |
| 190 | <chem>CC[N@@H+]1CCc2c(C1)sc(c2C(=O)N)NC(=S)NC(=O)c1c(Br)cnn1C</chem>                                                                                                   | 20,5<br>992 |
|     |                                                                                                                                                                        | -           |
| 191 | <chem>COc1ccc2c(c1)sc(n2)N1C(=O)c2c([C@H]1c1ccc(c(c1)OC)O)c(=O)c1c(o2)cccc1</chem>                                                                                     | 23,2<br>908 |
|     |                                                                                                                                                                        | -           |
| 192 | <chem>Clc1ccc(cc1)COC1cccc(c1)/C=N/c1sc2c(c1C(=O)Nc1ccc(cc1)Cl)CC[C@@H](C2)C(C)(C)C</chem>                                                                             | 21,1<br>232 |
|     |                                                                                                                                                                        | -           |
| 193 | <chem>COC1cc(OC)ccc1C(=O)/N=c/1\sc2c(n1C)ccc(c2)S(=O)(=O)C</chem>                                                                                                      | 20,8<br>435 |
|     |                                                                                                                                                                        | -           |
| 194 | <chem>O=C(/N=c/1\cc([nH]n1[C@H]1CCS(=O)(=O)C1)C)CCc1c(C)n[nH]c1C</chem>                                                                                                | 20,5<br>321 |
|     |                                                                                                                                                                        | -           |
| 195 | <chem>O1CCN(CC1)c1nnc(n1Cc1cccc1)SCc1onc(n1)c1cscc1</chem>                                                                                                             | 20,6<br>485 |
|     |                                                                                                                                                                        | -           |
| 196 | <chem>Clc1ccc2c(c1)s/c(=N\C(=O)c1ccc(cc1)S(=O)(=O)N1CCCc3c1cccc3)/n2C</chem>                                                                                           | 23,7<br>146 |
|     |                                                                                                                                                                        | -           |
| 197 | <chem>CC(=O)/N=C\1/CC(=CC(=C1)[NH3+])CCc1cccc1</chem>                                                                                                                  | 20,6<br>249 |
|     |                                                                                                                                                                        | -           |
| 198 | <chem>O=C(Cc1c(C)noc1C)N=c1[nH]c2c([nH]1)cccc2</chem>                                                                                                                  | 21,8<br>791 |
|     |                                                                                                                                                                        | -           |
| 199 | <chem>[NH3+]C[C@H]1O[C@H](O[C@@H]2[C@@H]([NH3+])C[C@H]([C@H]([C@@H]2O)O[C@@H]2O[C@@H](CO)[C@H]([C@@H]([C@@H]2O)[NH3+])O)[NH3+])[C@H](C[C@@H]1O)[NH3+]</chem>           | 22,2<br>492 |
|     |                                                                                                                                                                        | -           |
| 200 | <chem>[NH3+]C[C@@H]1O[C@H](O[C@@H]2[C@@H]([NH3+])C[C@H]([C@H]([C@@H]2O)O[C@H]2O[C@@H](CO)[C@H]([C@@H]([C@@H]2O)[NH3+])O)[NH3+])[C@H]([C@@H]([C@@H]([C@@H]1O)O)O</chem> | 24,5<br>993 |

#### 4. DL Classification

Chompounds from ChEMBL with 3CL<sup>Pro</sup> activity data in csv format (SMILES and ChEMBL Standard value (IC<sub>50</sub> in nM))

Cc1nc(S(=O)(=O)c2ccccc2)c(C#N)c(C)c1[N+](=O)[O-],13000  
 CCOC(=O)/C=C/[C@H](C[C@@H]1CCNC1=O)NC(=O)[C@H](CC=C(C)C)CC(=O)[C@@H](NC(=O)c1cc(C)on1)  
 C(C)C,70000  
 CSc1[nH]nc(NC(=O)c2cccs2)c1S(=O)(=O)c1ccccc1,15000  
 O=S(=O)(Cc1[nH]c(-c2ccc(Cl)s2)c[s+](1)c1cccs1.[Br-],18000  
 Cc1oc(C(C)(C)C)cc1-c1cc(NS(=O)(=O)c2cccs2)[nH]n1,10000  
 O=C(Oc1cncc(Cl)c1)c1ccco1,60  
 CCOC(=O)/C(C#N)=C/Nc1ccc(S(=O)(=O)c2ccc(/N=C/C(C#N)=C(\O)OCC)cc2)cc1,16000  
 CSc1nn(-c2c([N+](=O)[O-])c(C)nn2C)c(-c2cccs2)c1C#N,18000  
 O=[N+](/[O-])c1ccc(S(=O)(=O)c2ccc(Cl)cc2)[n+](/[O-])c1,15000  
 O=C(O)c1ccc(S(=O)(=O)c2cc(Br)c(O)c(Br)c2)cc1,16000  
 CCOC(=O)C(=CNc1ccc(S(=O)(=O)c2ccc(/N=C/C(C(=O)OCC)cc2)cc1)C(=O)OCC,32000  
 Cc1noc(NC(=O)c2ccc(-c3cc(C(F)(F)F)nn3C)s2)c1[N+](=O)[O-],5000  
 CC(Sc1nc(O)c(C#N)c(-c2ccccc2)n1)C(=O)Nc1ccc(Cl)cc1,300000  
 Cc1cc(O)nc(SCC(=O)Nc2ccc(Oc3ccc(Cl)cc3)cc2)n1,200000  
 CCCc1cc(O)nc(SCC(=O)Nc2ccc(Cl)cc2)n1,30000  
 O=C1C(=O)N(CC2COc3ccccc3O2)c2ccc(I)cc21,13500  
 O=C1C(=O)N(Cc2cc3ccccc3s2)c2c1cccc2[N+](=O)[O-],2000  
 Cc1nn(C)c(NCc2ccc(-c3cccs3)s2)c1[N+](=O)[O-],20000  
 CC(C)c1ccc(NC(=O)CSc2nccc(-c3csc(COc4ccccc4Cl)n3)n2)cc1,200000  
 Cc1nc(-c2nc(-c3ccnc(SCC(=O)Nc4ccc(Cl)cc4)n3)cs2)cs1,70794578438413.7  
 CSc1sc(-c2nc(C)cs2)c(C)c1-c1ccnc(SCC(=O)Nc2ccc(Cl)cc2)n1,11000  
 Cn1nc(-c2ccc(-c3ccnc(SCC(=O)Nc4ccc(Cl)cc4)n3)s2)cc1C(F)(F)F,1000000000000000  
 O=C(CSc1nccc(-c2csc(-c3ccccc3)n2)n1)Nc1cc(Cl)cc(Cl)c1,3000  
 COC(OC)c1cc(O)nc(SCC(=O)Nc2ccc(C(F)(F)F)cc2)n1,4897788193684.46  
 COC(OC)c1cc(O)nc(SCC(=O)Nc2ccc(C(F)(F)F)cc2)n1,200000  
 Cc1cc(O)nc(SCC(=O)Nc2cc(Cl)ccc2Oc2ccccc2)n1,1000000000000000  
 CSc1sc(-c2nc(C)cs2)c(C)c1-c1ccnc(SCC(=O)Nc2ccccc2Cl)n1,12000  
 Cc1cc(O)nc(SCC(=O)Nc2ccc(Oc3ccc(Cl)cc3)cc2)n1,4897788193684.46  
 Cc1noc(C)c1CN1C(=O)C(=O)c2cc(C#N)ccc21,7200  
 CC(C)(C)c1ccc(NC(=O)CSc2nc(O)c(C#N)c(C3CCCC3)n2)cc1,2818382931264.45  
 O=C(CSc1nccc(-c2cc(-c3ccccc3)no2)n1)Nc1ccc(Cl)cc1,66069344800759.7  
 COc1ccc(-c2nc(SCC(=O)Nc3ccc([N+](=O)[O-])cc3)nc(O)c2C#N)c1,300000  
 O=C(CSc1nccc(-c2cc(-c3ccccc3Cl)no2)n1)Nc1ccc(Cl)cc1,66069344800759.7  
 CCCc1cc(O)nc(SCC(=O)Nc2ccc(Cl)cc2)n1,33113112148259.1  
 O=C(Oc1cncc(Cl)c1)c1cscn1,270  
 O=C(Oc1cncc(Cl)c1)c1ccc(-c2ccc(Cl)cc2)o1,63  
 O=C(Nc1ccc(Cl)cc1)c1ccc(CN2C(=O)C(=O)c3cc(I)ccc32)s1,12570  
 CCCCN1C(=O)C(=O)c2cc(C(N)=O)ccc21,19000  
 O=C1C(=O)N(Cc2cc3ccccc3s2)c2ccccc21,13110  
 O=C1C(=O)N(Cc2cc3ccccc3s2)c2ccccc(Cl)c21,11200  
 CCCCN1C(=O)C(=O)c2cc(I)ccc21,66000  
 O=C(Oc1cncc(Br)c1)c1ccco1,50  
 O=C(Oc1cncc(Cl)c1)c1cc2ccccc2o1,170  
 C[C@H]1COC2=C1C(=O)C(=O)c1c2ccc2c1CCCC2(C)C,10100  
 Cc1coc2c1C(=O)C(=O)c1c-2ccc2c1CCCC2(C)CO,52000  
 O=C(Oc1cncc(Cl)c1)c1cc2ccccc2s1,95  
 C[C@H]1COC2=C1C(=O)C(=O)c1c2ccc2c1CCCC2(C)C,226700  
 COc1cccc(C(=O)Oc2cncc(Cl)c2)c1,340  
 COc1cccc(-c2nc(SCC(=O)Nc3ccc([N+](=O)[O-])cc3)nc(O)c2C#N)c1,3311311214825.91  
 COc1ccc(NC(=O)CSc2nc(O)cc(-c3ccccc3)n2)cc1OC,21877616239495.5  
 O=C(CSc1nccc(-c2cc(-c3ccccc3Cl)no2)n1)Nc1ccc(Cl)cc1,15000  
 Cc1nc(SCC(=O)Nc2ccc([N+](=O)[O-])cc2)nc(O)c1C,10000000000000  
 COc1cccc(-c2nc(SCC(=O)Nc3ccc(C(C)=O)cc3)nc(O)c2C#N)c1,16595869074375.6  
 O=C1C(=O)N(Cc2cc3ccccc3s2)c2c(Br)cccc21,980  
 O=[N+](/[O-])c1ccc(S(=O)(=O)c2ccc([N+](=O)[O-])cc2)cc1,25000  
 Cc1cccc2c3c(ccc12)C1=C(C(=O)C3=O)[C@@H](C)CO1,14400  
 Cc1coc2c1C(=O)C(=O)c1c-2ccc2c1CCCC2(C)C,1600  
 CCC(Sc1nc(O)c(C#N)c(-c2ccc(OC)c2)n1)C(=O)Nc1ccc(C(C)=O)cc1,16595869074375.6  
 CSc1sc(-c2nc(C)cs2)c(C)c1-c1ccnc(SCC(=O)Nc2ccccc2Cl)n1,83176377110267.1  
 COc1ccc(-c2ccnc(SCC(=O)Nc3ccc(C(C)C)cc3)n2)cc1,2454708915685.03  
 CCOC1ccc(N2C(=O)CC(Sc3nc(C)cc(C)n3)C2=O)cc1,300000  
 O=C(CSc1nccc(-c2cc(-c3ccccc3)no2)n1)Nc1ccc(Cl)cc1,15000  
 Cc1nc(-c2nc(-c3ccnc(SCC(=O)Nc4ccc(Cl)cc4)n3)cs2)cs1,14000  
 CSc1sc(-c2nc(C)cs2)c(C)c1-c1ccnc(SCC(=O)Nc2ccc(Cl)cc2)n1,89125093813374.4  
 O=C1C(=O)N(Cc2ccc(C(=O)N3CCCC3)s2)c2ccc(I)cc21,17500  
 O=C1C(=O)N(Cc2cc3ccccc3s2)c2ccc(I)cc21,950

O=C(Sc1nnc(C(F)(F)F)[nH]1)c1ccc(C#Cc2ccccc2)o1,3000  
Cc1cc(S(=O)(=O)c2c([N+](=O)[O-])cc(C(F)(F)F)cc2[N+](=O)[O-])c(Cl)cc1Cl,300  
CN1C(=O)C(=O)c2cc(C(N)=O)ccc21,71000  
Cc1coc2c1C(=O)C(=O)c1c-2ccc2c1CCCC2(C)C,89100  
Cc1cccc2c3c(ccc12)C1=C(C(=O)C3=O)[C@@H](C)CO1,1200  
Nc1ncc(S(=O)(=O)c2ccc(Cl)cc2)c(N)n1,6000  
Cc1cc(C(F)(F)F)nc(SCC(=O)Nc2ccc(Cl)cc2F)n1,500000  
CCCCc1ccc(NC(=O)CSc2nc(O)c(C#N)c(C3CCCC3)n2)c(C)c1,4897788193684.46  
O=C(Cc1nccs1)c1nccs1,40000  
Cc1coc2c1C(=O)C(=O)c1c-2ccc2c(C)cccc12,38700  
C[C@H]1COC2=C1C(=O)C(=O)c1c2ccc2c1CCCC2(C)C,800  
O=C(Oc1cncc(Cl)c1)c1cc2ccccc2[nH]1,65  
C[C@H]1COC2=C1C(=O)C(=O)c1c2ccc2c1CCCC2(C)C,87600  
CCOC(=O)/C=C/[C@H](C[C@@H]1CCNC1=O)NC(=O)[C@@H](CC(=O)[C@@H](NC(=O)c1cc(C)on1)C(C)C)Cc  
1cccc1,45000  
CC(C)C1=Cc2ccc3c(c2C(=O)C1=O)CCCC3(C)C,30000  
O=C1C(=O)N(Cc2ccc(F)cc2Cl)c2ccc(I)cc21,9400  
O=C1C(=O)N(Cc2cc3ccccc3s2)c2ccc(F)cc21,4820  
O=[N+][O-]c1cc(C(F)(F)F)ccc1S(=O)(=O)c1ccc(Cl)cc1,12000  
Cc1ccc(S(=O)(=O)c2nc(C)c([N+](=O)[O-])c(C)c2C#N)cc1,13000  
CCOC(=O)c1cncc(SCC(=O)Nc2ccc([N+](=O)[O-])cc2)nc1N,3981071705534.97  
N#Cc1c(O)nc(SCC(=O)Nc2cccc(C(F)(F)F)c2)nc1-c1cccc1,4897788193684.46  
Cn1nc(-c2ccc(-c3ccnc(SCC(=O)Nc4ccc(Cl)cc4)n3)s2)cc1C(F)(F)F,10000  
COc1cccc(-c2nc(SCC(=O)Nc3ccc(S(N)(=O)=O)cc3)nc(O)c2C#N)c1,24547089156850.3  
COc1cccc(-c2nc(SCC(=O)Nc3ccc(C(C)=O)cc3)nc(O)c2C#N)c1,60000  
CCOC(=O)c1cncc(SCC(=O)Nc2ccc([N+](=O)[O-])cc2)nc1N,250000  
CCC(Sc1nc(O)c(C#N)c(-c2cccc(OC)c2)n1)C(=O)Nc1ccc(C(C)=O)cc1,60000  
CC(C)c1ccc(NC(=O)CSc2nccc(-c3cccs3)n2)cc1,24547089156850.3  
O=C(CSc1nccc(-c2cc(-c3ccc(Cl)cc3Cl)no2)n1)Nc1ccc(C(F)(F)F)cc1,66069344800759.7  
O=C(CSc1nccc(-c2cc(-c3ccc(Cl)cc3Cl)no2)n1)Nc1ccc(C(F)(F)F)cc1,15000  
Cc1nc(SCC(=O)Nc2ccc([N+](=O)[O-])cc2)nc(O)c1C,1000000  
CC(C)(C)c1ccc(NC(=O)CSc2nc(O)c(C#N)c(C3CCCC3)n2)cc1,350000  
NC(=O)c1ccc2c(c1)C(=O)C(=O)N2Cc1cccc1,12500  
O=C1C(=O)N(Cc2ccc3ccccc3c2)c2ccc(I)cc21,1100  
COc1ccc(NC(=O)CSc2nc(O)cc(-c3ccccc3)n2)cc1OC,45000  
CCOc1ccc(N2C(=O)CC(Sc3nc(C)cc(C)n3)C2=O)cc1,3311311214825.91  
CC(=O)c1cccc1S(=O)(=O)c1cccc1C(=O)O,16000  
CC1(C)CC(=O)c2c(NCc3ccc3)sc(C#N)c2C1,16000  
Cc1cc(O)nc(SCC(=O)Nc2cc(Cl)ccc2Oc2ccccc2)n1,100000  
CCCCc1ccc(NC(=O)CSc2nc(O)c(C#N)c(C3CCCC3)n2)c(C)c1,200000  
CC(C)C1=Cc2ccc3c(c2C(=O)C1=O)CCCC3(C)C,78900  
O=C(Oc1ccc(S(=O)(=O)c2ccc(OC(=O)C(Cl)=C(Cl)Cl)cc2)cc1)C(Cl)=C(Cl)Cl,900  
NC(=O)c1ccc2c(c1)C(=O)C(=O)N2Cc1ccc2ccccc2c1,370  
CCCN1C(=O)C(=O)c2cc(C(N)=O)ccc21,25000  
O=C1C(=O)N(Cc2ccccc2)c2ccc(I)cc21,50000  
Cc1cccc2c3c(ccc12)C1=C(C(=O)C3=O)[C@@H](C)CO1,4900  
COC(=O)[C@@]1(C)CCc2c1ccc1c2C(=O)C(=O)c2c(C)coc2-1,21100  
O=C1C(=O)N(C/C=C/c2cc3ccccc3s2)c2ccc(I)cc21,23500  
O=C(CSc1nccc(-c2csc(-c3ccccc3)n2)n1)Nc1cc(Cl)cc(Cl)c1,331131121482591  
CC(C)c1ccc(NC(=O)CSc2nccc(-c3cccs3)n2)cc1,40000  
Cc1cc(C(F)(F)F)nc(SCC(=O)Nc2ccc(Cl)cc2F)n1,1995262314968.88  
COc1ccc(-c2ccnc(SCC(=O)Nc3ccc(C(C)C)cc3)n2)cc1,400000  
CC(Sc1nc(O)c(C#N)c(-c2ccccc2)n1)C(=O)Nc1ccc(Cl)cc1,3311311214825.91  
N#Cc1c(O)nc(SCC(=O)Nc2cccc(C(F)(F)F)c2)nc1-c1cccc1,200000  
CC(C)c1ccc(NC(=O)CSc2nccc(-c3csc(COc4ccccc4Cl)n3)n2)cc1,4897788193684.46  
COc1cccc(-c2nc(SCC(=O)Nc3ccc(S(N)(=O)=O)cc3)nc(O)c2C#N)c1,40000  
Cc1coc2c1C(=O)C(=O)c1c-2ccc2c1CCCC2(C)CO,10700  
CC(C)C1=Cc2ccc3c(c2C(=O)C1=O)CCCC3(C)C,21100  
Cc1coc2c1C(=O)C(=O)c1c-2ccc2c(C)cccc12,700  
Cc1coc2c1C(=O)C(=O)c1c-2ccc2c(C)cccc12,11500  
CC(C)C1=Cc2ccc3c(c2C(=O)C1=O)CCCC3(C)C,60200  
Cc1coc2c1C(=O)C(=O)c1c-2ccc2c1CCCC2(C)C,17100  
Cc1cccc2c3c(ccc12)C1=C(C(=O)C3=O)[C@@H](C)CO1,10700  
Cc1coc2c1C(=O)C(=O)c1c-2ccc2c1CCCC2(C)CO,18000  
COC(=O)[C@@]1(C)CCc2c1ccc1c2C(=O)C(=O)c2c(C)coc2-1,10600  
Cc1coc2c1C(=O)C(=O)c1c-2ccc2c(C)cccc12,8800  
Cc1coc2c1C(=O)C(=O)c1c-2ccc2c1CCCC2(C)CO,24800



COC(=O)[C@@]1(C)CCCc2c1ccc1c2C(=O)C(=O)c2c(C)coc2-1,9200

Compounds with any activity data on viral cysteine proteases were extracted from ChEMBL (4.11.2020) and the complete file in csv format is supplied as part of supporting information. The decoyes employed were obtained as a standard 1k decoy set from Schrödinger LLC.

chembl\_id,canonical\_smiles,organism,full\_mwt,l1,l2,l3

### 3.1 Machine Learning

Herein, the following steps are of relevance. First, the database of relevant target and decoy molecules is constructed. Next, stratified splits of the data are obtained – these types of data splits ensure approximately equal distributions of different classes (relevant for classification). Multiple splits are obtained, and for each one, a model is trained and evaluated. As the best performing model was a neural network, we emphasize this model next. The overall architecture can be summarized as follows:

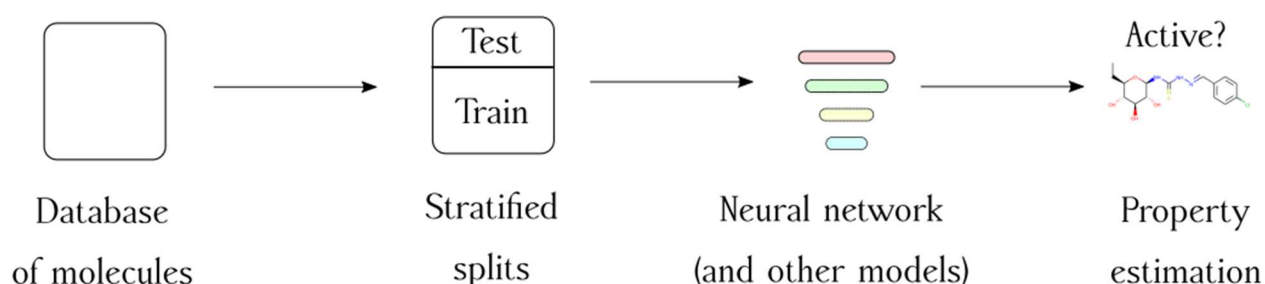

**Figure S3: The overview of the learning process.**

The architecture can be understood as a feedforward neural network with additional dropout layers attached. The final layer is either a ReLU – in this case the network performs regression for one target, or sigmoid, in which case it performs binary classification. Feature space was constructed as follows. We used the DeepChem library to produce RDKit descriptors via the “`RDKitDescriptors()`” call on the input SMILES-formatted molecules. The considered descriptors were the following ones and referenced in the section RDKit (<https://www.rdkit.org/docs/GettingStartedInPython.html#list-of-available-descriptors>):

['MaxEStateIndex', 'MinEStateIndex', 'MaxAbsEStateIndex', 'MinAbsEStateIndex', 'qed', 'MolWt', 'HeavyAtomMolWt', 'ExactMolWt', 'NumValenceElectrons', 'NumRadicalElectrons',

'MaxPartialCharge', 'MinPartialCharge', 'MaxAbsPartialCharge', 'MinAbsPartialCharge', 'FpDensityMorgan1', 'FpDensityMorgan2', 'FpDensityMorgan3', 'BCUT2D\_MWHI', 'BCUT2D\_MWLOW', 'BCUT2D\_CHGHI', 'BCUT2D\_CHGLO', 'BCUT2D\_LOGPHI', 'BCUT2D\_LOGPLOW', 'BCUT2D\_MRHI', 'BCUT2D\_MRLOW', 'BalabanJ', 'BertzCT', 'Chi0', 'Chi0n', 'Chi0v', 'Chi1', 'Chi1n', 'Chi1v', 'Chi2n', 'Chi2v', 'Chi3n', 'Chi3v', 'Chi4n', 'Chi4v', 'HallKierAlpha', 'Ipc', 'Kappa1', 'Kappa2', 'Kappa3', 'LabuteASA', 'PEOE\_VSA1', 'PEOE\_VSA10', 'PEOE\_VSA11', 'PEOE\_VSA12', 'PEOE\_VSA13', 'PEOE\_VSA14', 'PEOE\_VSA2', 'PEOE\_VSA3', 'PEOE\_VSA4', 'PEOE\_VSA5', 'PEOE\_VSA6', 'PEOE\_VSA7', 'PEOE\_VSA8', 'PEOE\_VSA9', 'SMR\_VSA1', 'SMR\_VSA10', 'SMR\_VSA2', 'SMR\_VSA3', 'SMR\_VSA4', 'SMR\_VSA5', 'SMR\_VSA6', 'SMR\_VSA7', 'SMR\_VSA8', 'SMR\_VSA9', 'SlogP\_VSA1', 'SlogP\_VSA10', 'SlogP\_VSA11', 'SlogP\_VSA12', 'SlogP\_VSA2', 'SlogP\_VSA3', 'SlogP\_VSA4', 'SlogP\_VSA5', 'SlogP\_VSA6', 'SlogP\_VSA7', 'SlogP\_VSA8', 'SlogP\_VSA9', 'TPSA', 'EState\_VSA1', 'EState\_VSA10', 'EState\_VSA11', 'EState\_VSA2', 'EState\_VSA3', 'EState\_VSA4', 'EState\_VSA5', 'EState\_VSA6', 'EState\_VSA7', 'EState\_VSA8', 'EState\_VSA9', 'VSA\_EState1', 'VSA\_EState10', 'VSA\_EState2', 'VSA\_EState3', 'VSA\_EState4', 'VSA\_EState5', 'VSA\_EState6', 'VSA\_EState7', 'VSA\_EState8', 'VSA\_EState9', 'FractionCSP3', 'HeavyAtomCount', 'NHOHCount', 'NOCount', 'NumAliphaticCarbocycles', 'NumAliphaticHeterocycles', 'NumAliphaticRings', 'NumAromaticCarbocycles', 'NumAromaticHeterocycles', 'NumAromaticRings', 'NumHAcceptors', 'NumHDonors', 'NumHeteroatoms', 'NumRotatableBonds', 'NumSaturatedCarbocycles', 'NumSaturatedHeterocycles', 'NumSaturatedRings', 'RingCount', 'MolLogP', 'MolMR', 'fr\_Al\_COO', 'fr\_Al\_OH', 'fr\_Al\_OH\_noTert', 'fr\_ArN', 'fr\_Ar\_COO', 'fr\_Ar\_N', 'fr\_Ar\_NH', 'fr\_Ar\_OH', 'fr\_COO', 'fr\_COO2', 'fr\_C\_O', 'fr\_C\_O\_noCOO', 'fr\_C\_S', 'fr\_HOCCN', 'fr\_Imine', 'fr\_NH0', 'fr\_NH1', 'fr\_NH2', 'fr\_N\_O', 'fr\_Ndealkylation1', 'fr\_Ndealkylation2', 'fr\_Nhpyrrole', 'fr\_SH', 'fr\_aldehyde', 'fr\_alkyl\_carbamate', 'fr\_alkyl\_halide', 'fr\_allylic\_oxid', 'fr\_amide', 'fr\_amidine', 'fr\_aniline', 'fr\_aryl\_methyl', 'fr\_azide', 'fr\_azo', 'fr\_barbitur', 'fr\_benzene', 'fr\_benzodiazepine', 'fr\_bicyclic', 'fr\_diazo', 'fr\_dihydropyridine', 'fr\_epoxide', 'fr\_ester', 'fr\_ether', 'fr\_furan', 'fr\_guanido', 'fr\_halogen', 'fr\_hdrzine', 'fr\_hdrzone', 'fr\_imidazole', 'fr\_imide', 'fr\_isocyan', 'fr\_isothiocyan', 'fr\_ketone', 'fr\_ketone\_Topliss', 'fr\_lactam', 'fr\_lactone', 'fr\_methoxy', 'fr\_morpholine', 'fr\_nitrile', 'fr\_nitro', 'fr\_nitro\_ arom', 'fr\_nitro\_ arom\_nonortho', 'fr\_nitroso', 'fr\_oxazole', 'fr\_oxime', 'fr\_para\_hydroxylation', 'fr\_phenol', 'fr\_phenol\_noOrthoHbond', 'fr\_phos\_acid', 'fr\_phos\_ester', 'fr\_piperdine', 'fr\_piperzine', 'fr\_priamide', 'fr\_prisulfonamd', 'fr\_pyridine', 'fr\_quatN', 'fr\_sulfide', 'fr\_sulfonamd', 'fr\_sulfone', 'fr\_term\_acetylene', 'fr\_tetrazole', 'fr\_thiazole', 'fr\_thiocyan', 'fr\_thiophene', 'fr\_unbrch\_alkane', 'fr\_urea']

The descriptors are also referenced and described further in the Supporting Information under the section RDKit.

## 5. Physicochemical properties

Compound descriptors were calculated using QikProp by Schrödinger and RDKit ([rdkit.org](https://www.rdkit.org/docs/index.html); <https://www.rdkit.org/docs/index.html>; accessed on 10.1.2021). [63]

### QikProp:

- molecule name

Molecule name taken from the title line in the input structure file. If the title line is blank, the input file name is used.

- #stars

Number of property or descriptor values that fall outside the 95% range of similar values for known drugs. Outlying descriptors and predicted properties are denoted with asterisks (\*) in the .out file. A large number of stars suggests that a molecule is less drug-like than molecules with few stars. The following properties and descriptors are included in the determination of #stars: MW, dipole, IP, EA, SASA, FOSA, FISA, PISA, WPSA, PSA, volume, #rotor, donorHB, accptHB, glob, QPpolrz, QPlogPC16, QPlogPoct, QPlogPw, QPlogPo/w, logS, QPLogKhsa, QPlogBB, #metabol  
0 – 5

- #amine

Number of non-conjugated amine groups.  
0 – 1

- #amidine

Number of amidine and guanidine groups.  
0

- #acid

Number of carboxylic acid groups.  
0 – 1

- #amide

Number of non-conjugated amide groups.  
0 – 1

- #rotor

Number of non-trivial (not CX3), non-hindered (not alkene, amide, small ring) rotatable bonds.  
0 – 15

- #rtvFG

Number of reactive functional groups; the specific groups are listed in the jobname .out file. The presence of these groups can lead to false positives in HTS assays and to decomposition, reactivity, or toxicity problems in vivo. See Appendix A of the QikProp User Manual for a complete list.  
0 – 2

- CNS

Predicted central nervous system activity on a –2 (inactive) to +2 (active) scale.  
–2 to +2

- mol\_MW

Molecular weight of the molecule.  
130.0 – 725.0

- dipole

Computed dipole moment of the molecule.

1.0 – 12.5

- SASA

Total solvent accessible surface area (SASA) in square angstroms using a probe with a 1.4 Å radius.

300.0 – 1000.0

- FOSA

Hydrophobic component of the SASA (saturated carbon and attached hydrogen).

0.0 – 750.0

- FISA

Hydrophilic component of the SASA (SASA on N, O, H on heteroatoms, and carbonyl C).

7.0 – 330.0

- PISA

$\pi$  (carbon and attached hydrogen) component of the SASA.

0.0 – 450.0

- WPSA

Weakly polar component of the SASA (halogens, P, and S).

0.0 – 175.0

- volume

Total solvent-accessible volume in cubic angstroms using a probe with a 1.4 Å radius.

500.0 – 2000.0

- donorHB

Estimated number of hydrogen bonds that would be donated by the solute to water molecules in an aqueous solution. Values are averages taken over a number of configurations, so they can be non-integer.

0.0 – 6.0

- acceptHB

Estimated number of hydrogen bonds that would be accepted by the solute from water molecules in an aqueous solution. Values are averages taken over a number of configurations, so they can be non-integer.

2.0 – 20.0

- $\text{dip}^2/V$

Square of the dipole moment divided by the molecular volume. This is the key term in the Kirkwood-Onsager equation for the free energy of solvation of a dipole with volume  $V$ .

0.0 – 0.13

- $\text{ACxDN}^{.5}/\text{SA}$

Index of cohesive interaction in solids. This term represents the relationship  
; see Bioorg. Med. Chem. Lett. 2000, 10, 1155.

0.0 – 0.05

- glob

Globularity descriptor,

, where  $r$  is the radius of a sphere with a volume equal to the molecular volume. Globularity is 1.0 for a spherical molecule.

0.75 – 0.95

- QPpolrz

Predicted polarizability in cubic angstroms.

13.0 – 70.0

- QPlogPC16

Predicted hexadecane/gas partition coefficient.

4.0 – 18.0

- QPlogPoct

Predicted octanol/gas partition coefficient.

8.0 – 35.0

- QPlogPw

Predicted water/gas partition coefficient.

4.0 – 45.0

- QPlogPo/w

Predicted octanol/water partition coefficient.

–2.0 – 6.5

- QPlogS

Predicted aqueous solubility,  $\log S$ .  $S$  in  $\text{mol dm}^{-3}$  is the concentration of the solute in a saturated solution that is in equilibrium with the crystalline solid.

–6.5 – 0.5

- CIQPlogS

Conformation-independent predicted aqueous solubility,  $\log S$ .  $S$  in  $\text{mol dm}^{-3}$  is the concentration of the solute in a saturated solution that is in equilibrium with the crystalline solid.

–6.5 – 0.5

- QPlogHERG

Predicted IC50 value for blockage of HERG K<sup>+</sup> channels.

concern below –5

- QPPCaco

Predicted apparent Caco-2 cell permeability in nm/sec. Caco-2 cells are a model for the gut-blood barrier. QikProp predictions are for non-active transport.

<25 poor,

>500 great

- QPlogBB

Predicted brain/blood partition coefficient. Note: QikProp predictions are for orally delivered drugs so, for example, dopamine and serotonin are CNS negative because they are too polar to cross the blood-brain barrier

–3.0 – 1.2

- QPPMDCK

Predicted apparent MDCK cell permeability in nm/sec. MDCK cells are considered to be a good mimic for the blood-brain barrier. QikProp predictions are for non-active transport.

<25 poor,

>500 great

- QPlogKp

Predicted skin permeability, log Kp.

–8.0 – –1.0

- IP(ev)

PM3 calculated ionization potential (negative of HOMO energy).

7.9 – 10.5

- EA(eV)

PM3 calculated electron affinity (negative of LUMO energy).

–0.9 – 1.7

- #metab

Number of likely metabolic reactions. See Appendix A of the QikProp User Manual for a complete list of reactions.

1 – 8

- QPlogKhsa

Prediction of binding to human serum albumin.

–1.5 – 1.5

- HumanOralAbsorption

Predicted qualitative human oral absorption: 1, 2, or 3 for low, medium, or high. The text version is reported in the output. The assessment uses a knowledge-based set of rules, including checking for suitable values of PercentHumanOralAbsorption, number of metabolites, number of rotatable bonds, logP, solubility and cell permeability.

- PercentHumanOralAbsorption

Predicted human oral absorption on 0 to 100% scale. The prediction is based on a quantitative multiple linear regression model. This property usually correlates well with HumanOralAbsorption, as both measure the same property.

>80% is high

<25% is poor

- SAFluorine

Solvent-accessible surface area of fluorine atoms.  
0.0 – 100.0

- SAamideO

Solvent-accessible surface area of amide oxygen atoms.  
0.0 – 35.0

- PSA

Van der Waals surface area of polar nitrogen and oxygen atoms and carbonyl carbon atoms.  
7.0 – 200.0

- #NandO

Number of nitrogen and oxygen atoms.  
2 – 15

- RuleOfFive

Number of violations of Lipinski's rule of five. The rules are:  $\text{mol\_MW} < 500$ ,  $\text{QPlogPo/w} < 5$ ,  $\text{donorHB} \leq 5$ ,  $\text{acceptHB} \leq 10$ . Compounds that satisfy these rules are considered drug-like. (The "five" refers to the limits, which are multiples of 5.)  
maximum is 4

- RuleOfThree

Number of violations of Jorgensen's rule of three. The three rules are:  $\text{QPlogS} > -5.7$ ,  $\text{QPCaco} > 22 \text{ nm/s}$ ,  $\text{\# Primary Metabolites} < 7$ . Compounds with fewer (and preferably no) violations of these rules are more likely to be orally available.  
maximum is 3

- #ringatoms

Number of atoms in rings.

- #in34

Number of atoms in 3- or 4-membered rings.

- #in56

Number of atoms in 5- or 6-membered rings.

- #noncon

number of ring atoms not able to form conjugated aromatic systems (e.g.  $\text{sp}^3 \text{ C}$ ).

- #nonHatm

Number of heavy atoms (nonhydrogen atoms).

- Jm

Predicted maximum transdermal transport rate,  $\text{Kp} \times \text{MW} \times \text{S}$  ( $\mu\text{g cm}^{-2} \text{ hr}^{-1}$ ). Kp and S are obtained from the aqueous solubility and skin permeability, QPlogKp and QPlogS. This property is only written to the output file: it is not used in any other calculations.

**RDKit:**

List of Available (2D) Descriptors as in v. 2020.09.1:

| Descriptor/Descriptor Family                            | Notes                                                                                                                                |
|---------------------------------------------------------|--------------------------------------------------------------------------------------------------------------------------------------|
| Gasteiger/Marsili Partial Charges                       | <i>Tetrahedron</i> <b>36</b> :3219-28 (1980)                                                                                         |
| BalabanJ                                                | <i>Chem. Phys. Lett.</i> <b>89</b> :399-404 (1982)                                                                                   |
| BertzCT                                                 | <i>J. Am. Chem. Soc.</i> <b>103</b> :3599-601 (1981)                                                                                 |
| Ipc                                                     | <i>J. Chem. Phys.</i> <b>67</b> :4517-33 (1977)                                                                                      |
| HallKierAlpha                                           | <i>Rev. Comput. Chem.</i> <b>2</b> :367-422 (1991)                                                                                   |
| Kappa1 - Kappa3                                         | <i>Rev. Comput. Chem.</i> <b>2</b> :367-422 (1991)                                                                                   |
| Chi0, Chi1                                              | <i>Rev. Comput. Chem.</i> <b>2</b> :367-422 (1991)                                                                                   |
| Chi0n - Chi4n                                           | <i>Rev. Comput. Chem.</i> <b>2</b> :367-422 (1991)                                                                                   |
| Chi0v - Chi4v                                           | <i>Rev. Comput. Chem.</i> <b>2</b> :367-422 (1991)                                                                                   |
| MolLogP                                                 | Wildman and Crippen <i>JCICS</i> <b>39</b> :868-73 (1999)                                                                            |
| MolMR                                                   | Wildman and Crippen <i>JCICS</i> <b>39</b> :868-73 (1999)                                                                            |
| MolWt                                                   |                                                                                                                                      |
| ExactMolWt                                              |                                                                                                                                      |
| HeavyAtomCount                                          |                                                                                                                                      |
| HeavyAtomMolWt                                          |                                                                                                                                      |
| NHOHCount                                               |                                                                                                                                      |
| NOCCount                                                |                                                                                                                                      |
| NumHAcceptors                                           |                                                                                                                                      |
| NumHDonors                                              |                                                                                                                                      |
| NumHeteroatoms                                          |                                                                                                                                      |
| NumRotatableBonds                                       |                                                                                                                                      |
| NumValenceElectrons                                     |                                                                                                                                      |
| NumAmideBonds                                           |                                                                                                                                      |
| Num{Aromatic,Saturated,Aliphatic} Rings                 |                                                                                                                                      |
| Num{Aromatic,Saturated,Aliphatic} {Hetero,Carbo} cycles |                                                                                                                                      |
| RingCount                                               |                                                                                                                                      |
| FractionCSP3                                            |                                                                                                                                      |
| NumSpiroAtoms                                           | Number of spiro atoms (atoms shared between rings that share exactly one atom)                                                       |
| NumBridgeheadAtoms                                      | Number of bridgehead atoms (atoms shared between rings that share at least two bonds)                                                |
| TPSA                                                    | <i>J. Med. Chem.</i> <b>43</b> :3714-7, (2000) See the section in the RDKit book describing differences to the original publication. |
| LabuteASA                                               | <i>J. Mol. Graph. Mod.</i> <b>18</b> :464-77 (2000)                                                                                  |
| PEOE_VSA1 - PEOE_VSA14                                  | MOE-type descriptors using partial charges and surface area                                                                          |



|                            |                                                                                                                                                                                                                       |
|----------------------------|-----------------------------------------------------------------------------------------------------------------------------------------------------------------------------------------------------------------------|
|                            | contributions <a href="http://www.chemcomp.com/journal/vsadesc.htm">http://www.chemcomp.com/journal/vsadesc.htm</a>                                                                                                   |
| SMR_VSA1 - SMR_VSA10       | MOE-type descriptors using MR contributions and surface area contributions <a href="http://www.chemcomp.com/journal/vsadesc.htm">http://www.chemcomp.com/journal/vsadesc.htm</a>                                      |
| SlogP_VSA1 - SlogP_VSA12   | MOE-type descriptors using LogP contributions and surface area contributions <a href="http://www.chemcomp.com/journal/vsadesc.htm">http://www.chemcomp.com/journal/vsadesc.htm</a>                                    |
| EState_VSA1 - EState_VSA11 | MOE-type descriptors using EState indices and surface area contributions (developed at RD, not described in the CCG paper)                                                                                            |
| VSA_EState1 - VSA_EState10 | MOE-type descriptors using EState indices and surface area contributions (developed at RD, not described in the CCG paper)                                                                                            |
| MQNs                       | Nguyen et al. <i>ChemMedChem</i> <b>4</b> :1803-5 (2009)                                                                                                                                                              |
| Topliss fragments          | implemented using a set of SMARTS definitions in \$(RDBASE)/Data/FragmentDescriptors.csv                                                                                                                              |
| Autocorr2D                 | New in 2017.09 release. Todeschini and Consoni “Descriptors from Molecular Geometry” Handbook of Chemoinformatics <a href="https://doi.org/10.1002/9783527618279.ch37">https://doi.org/10.1002/9783527618279.ch37</a> |
| BCUT2D                     | New in 2020.09 release. Pearlman and Smith in “3D-QSAR and Drug design: Recent Advances” (1997)                                                                                                                       |

## SUPPORTING INFORMATION REFERENCES

[62] Jukic, M. *et al.* CmDock, <https://gitlab.com/Jukic/cmdock/>; **2021**.

[63] Tosco, P., Stiefl, N., & Landrum, G. (2014). Bringing the MMFF force field to the RDKit: implementation and validation. *Journal of Cheminformatics*, 6(1), 1-4.
